# Supplementary material
Source: MDPI journal article supplement (https://www.mdpi.com/2504-446X/6/9/255)
Supplement: s1 [file s1]

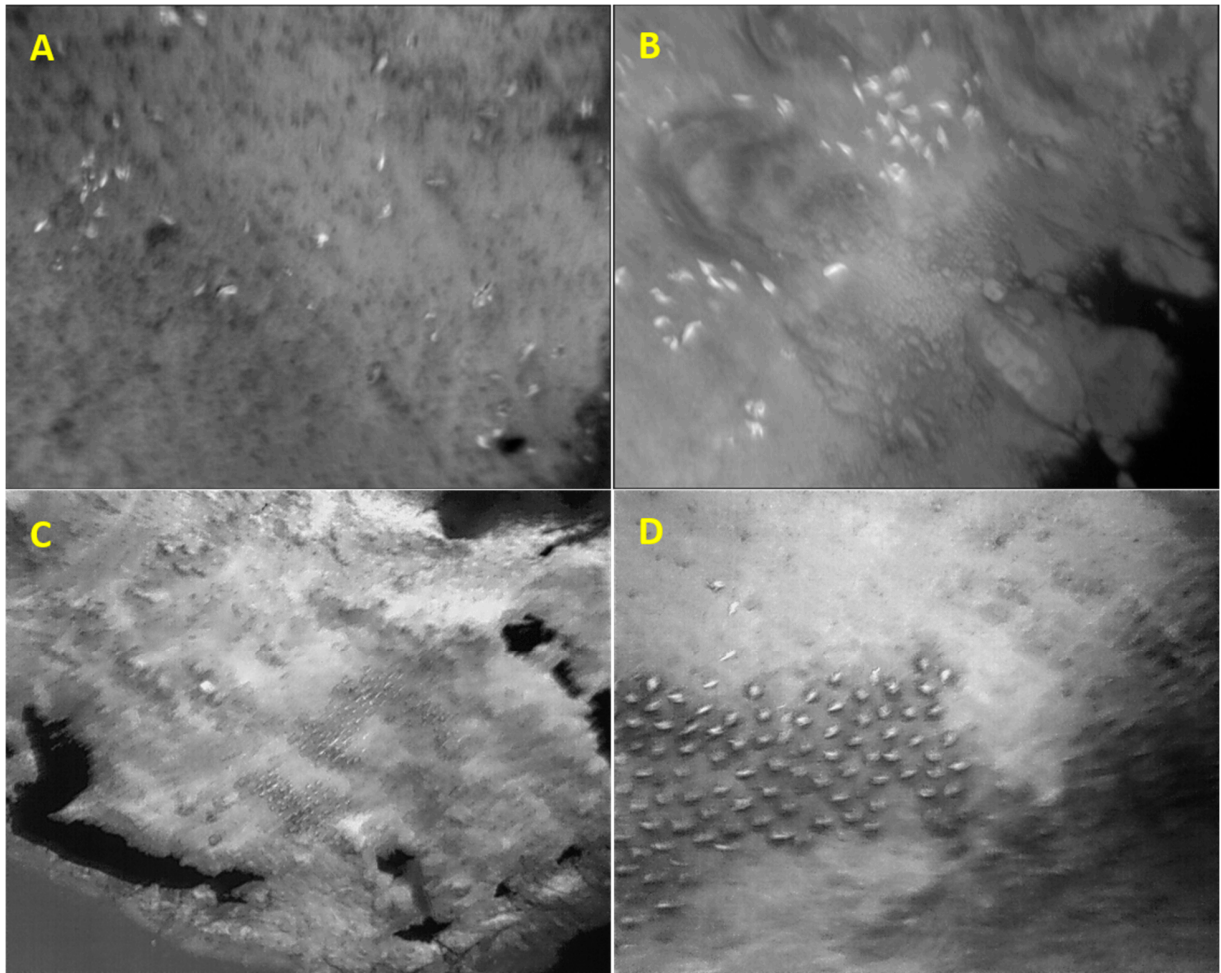

**Figure S1:** Example image from thermal (IR) sensor with blurring for Antarctic fur seals (A, B) and penguins (C,D).

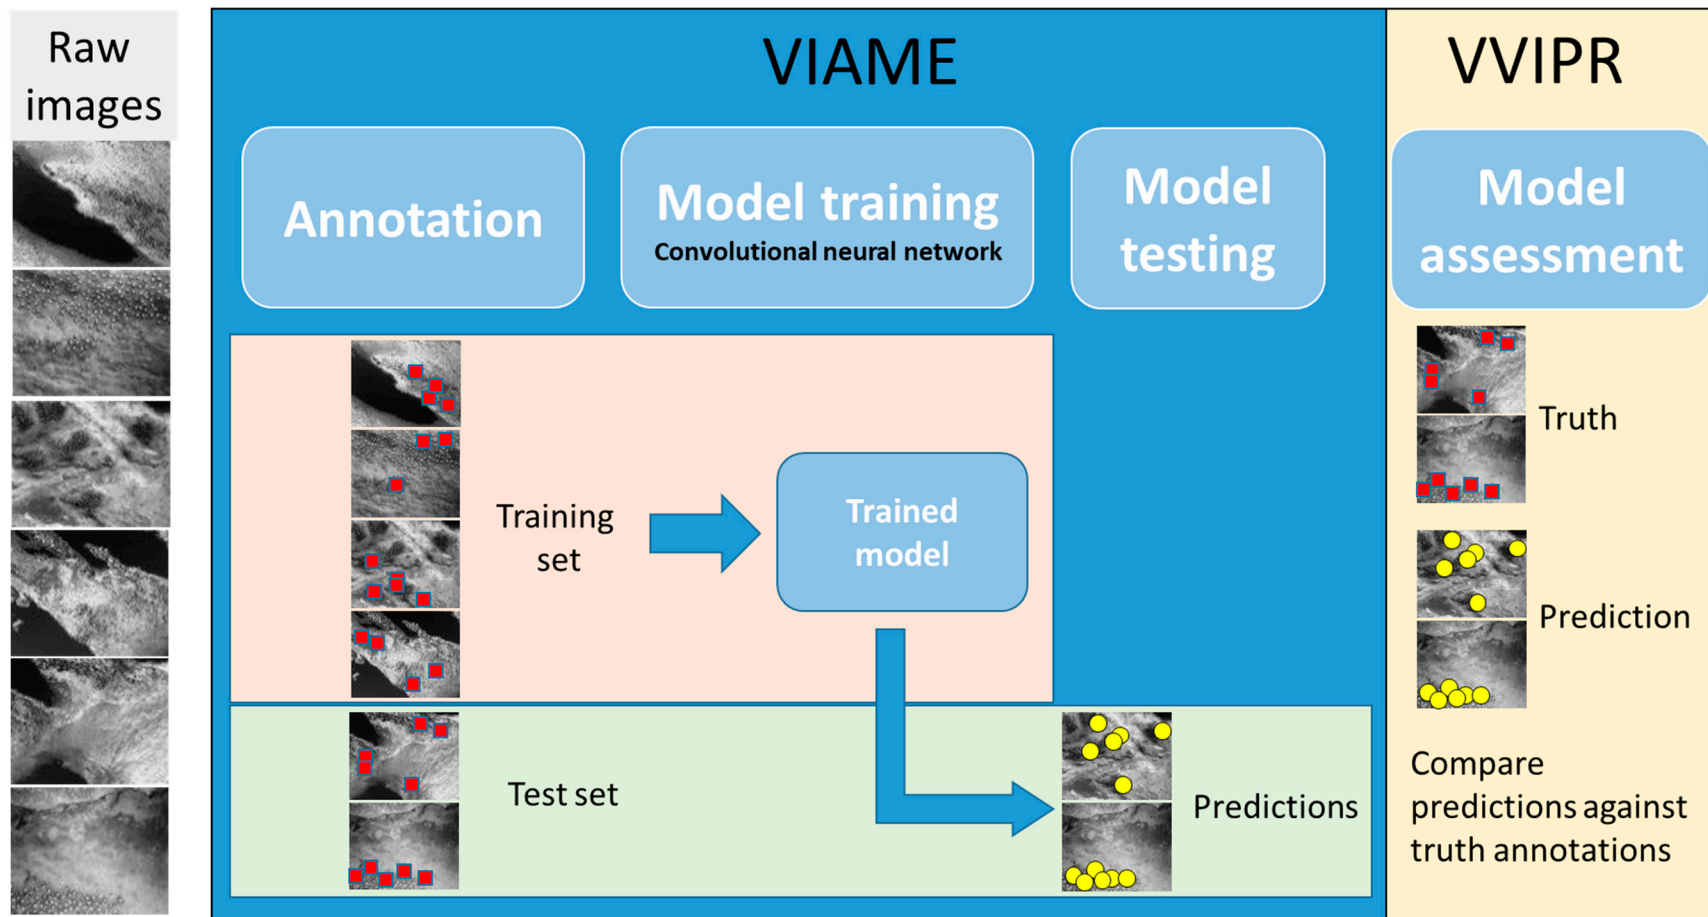

**Figure S2.** Schematic of image analysis process from annotation of raw images through to model assessment using the vvipr tool.
